# Supplementary material for: A novel Cu12(pz)12loop-based coordination polymer templated by double-Keggin anions
Source: Royal Society of Chemistry journal article supplement (doi:10.1039/c4nj00867g), 2014-08-05
Supplement: c4nj00867g1.pdf [file c4nj00867g1.pdf]

Supplemental Material for:

**A Novel Cu<sub>12</sub>(pz)<sub>12</sub> Loop-based Coordination Polymer  
Templated by Double-Keggin Anions†**

Shaobin Li, Huiyuan Ma\*, Haijun Pang\*, Li Zhang and Zhuanfang Zhang

**Table of contents:**

1. **Table S1** Summarization of known coordination compounds assembled from non-coordinating double-Keggin anions as templates.
2. **Fig. S1** The coordination modes of three crystallographically independent Cu cations.
3. **Fig. S2** The Cu<sub>12</sub>(pz)<sub>12</sub> loop in compound **1**.
4. **Fig. S3** The hydrogen bonding interactions between Cu<sub>12</sub>(pz)<sub>12</sub> loop and Keggin PW<sub>12</sub> anions.
5. **Fig. S4** The XPS spectrum of compound **1**.
6. **Fig. S5** The IR spectra of compound **1** (black) and the sample after the third run of the RhB degradation test (red).
7. **Fig. S6** The simulative (black) and experimental (red) PXRD patterns of compound **1**.
8. **Fig. S7** The UV-vis absorption spectrum of compound **1** in aqueous solution.
9. **Fig. S8** Three time of the RhB degradation test by (a) NBu<sub>4</sub>)<sub>3</sub>[PW<sub>12</sub>O<sub>40</sub>], and (b) compound **1**.

**Table S1.** Summarization of known coordination compounds assembled from non-coordinating double-Keggin anions as templates.

| Compounds                                                                                                                                                                                                                                                                                               | References                                                    |
|---------------------------------------------------------------------------------------------------------------------------------------------------------------------------------------------------------------------------------------------------------------------------------------------------------|---------------------------------------------------------------|
| 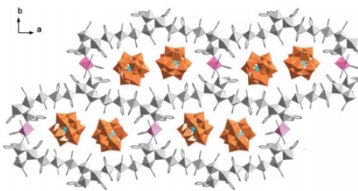 $[\{\text{Mn}(\text{bpy})(\text{py})(\text{H}_2\text{O})_2\}\{\text{Mo}_{12}\text{O}_{34}(\text{bpy})_{12}\}][\text{PMo}_{12}\text{O}_{40}]_2 \cdot 2\text{H}_2\text{O}$                                              | <i>Enbo Wang et al.,<br/>Chem. Commun.</i><br>2007, 770       |
|  $[\text{Ln}(\text{L})_{1.5}(\text{H}_2\text{O})_5][\text{PMo}_{12}\text{O}_{40}] \cdot 1.5\text{CH}_3\text{CN} \cdot 2\text{H}_2\text{O}$                                                                             | <i>Enbo Wang et al.,<br/>Dalton Trans.</i><br>2011, 40, 5971  |
|  $[\text{Cu}_2(\text{L}_3)(\text{SiMo}_{12}\text{O}_{40})(\text{H}_2\text{O})_6] \cdot 4\text{H}_2\text{O}$ $[\text{Cu}_2(\text{L}_3)(\text{SiW}_{12}\text{O}_{40})(\text{H}_2\text{O})_6] \cdot 4\text{H}_2\text{O}$ | <i>Xiuli Wang et al.,<br/>CrystEngComm.</i><br>2012, 14, 5836 |
|  $[\text{Cu}_5(\text{pz})_6(\text{H}_2\text{O})_4][\text{PW}^{\text{VI}}_{10}\text{W}^{\text{V}}_2\text{O}_{40}]$                                                                                                    | This work                                                     |

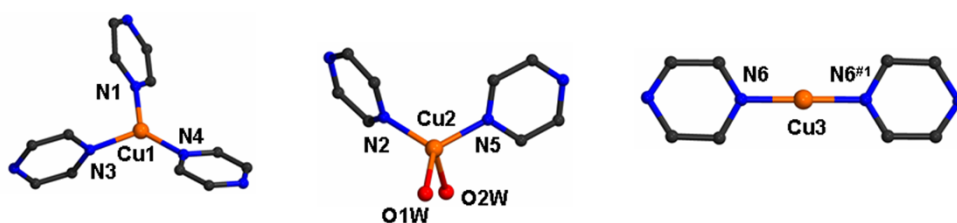

**Fig. S1.** The coordination modes of three crystallographically independent Cu cations.

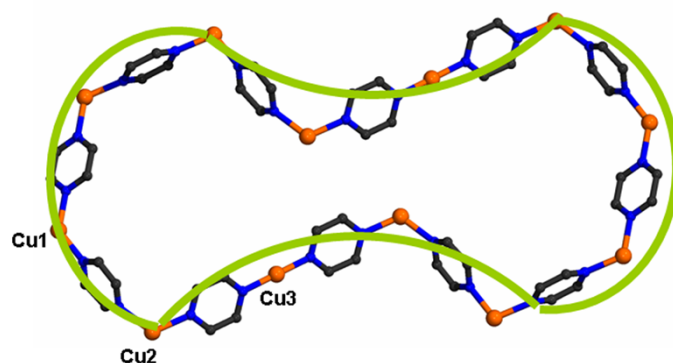

**Fig. S2.** The  $\text{Cu}_{12}(\text{pz})_{12}$  loop in compound 1.

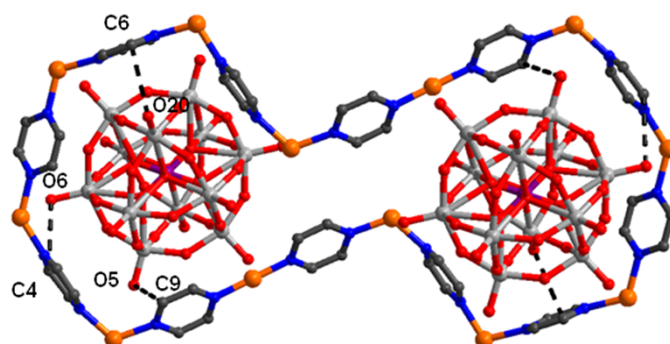

**Fig. S3.** The hydrogen bonding interactions between dumbbell  $\text{Cu}_{12}(\text{pz})_{12}$  loop and Keggin  $\text{PW}_{12}$  anions.

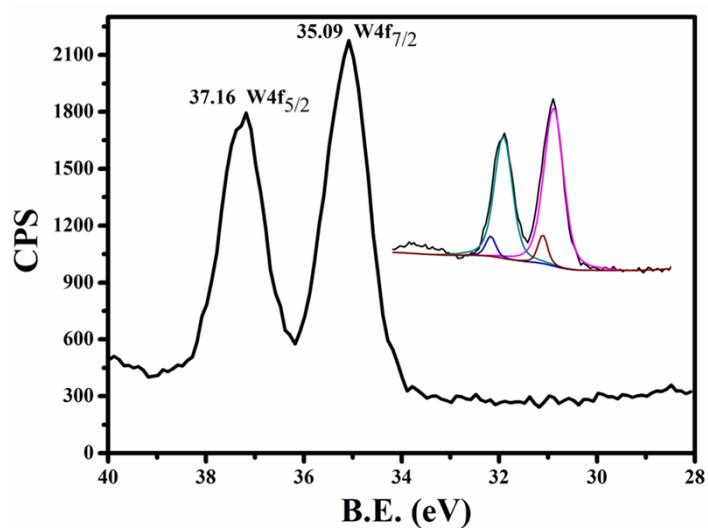

**Fig. S4.** The XPS spectrum of compound 1.

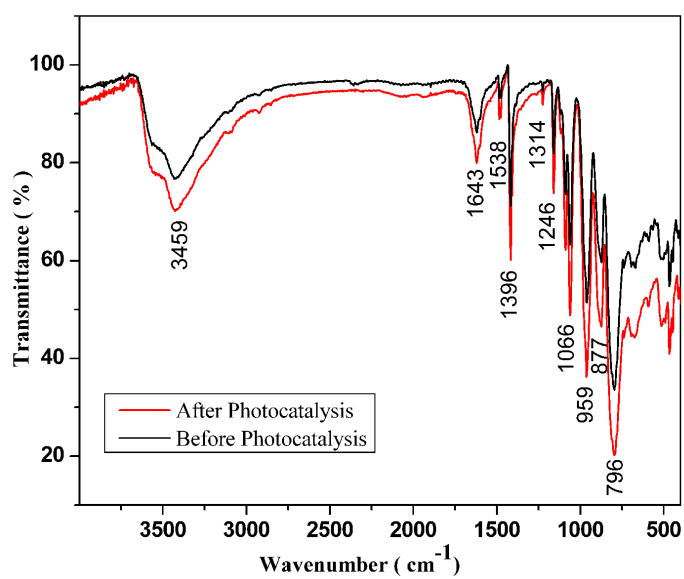

**Fig. S5.** The IR spectra of compound 1 (black) and the sample after the third run of the RhB degradation test (red).

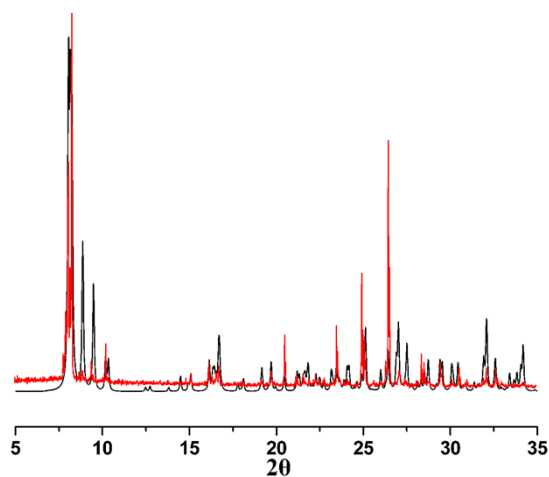

**Fig. S6.** The simulative (black) and experimental (red) powder X-ray diffraction patterns for compound **1**.

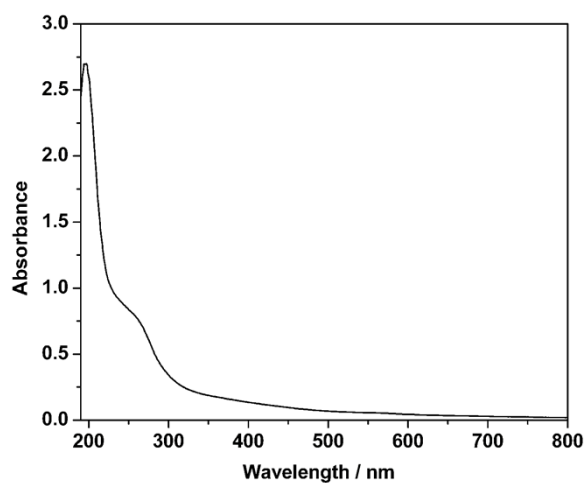

**Fig. S7.** The UV-vis absorption spectrum of compound **1** in aqueous solution.

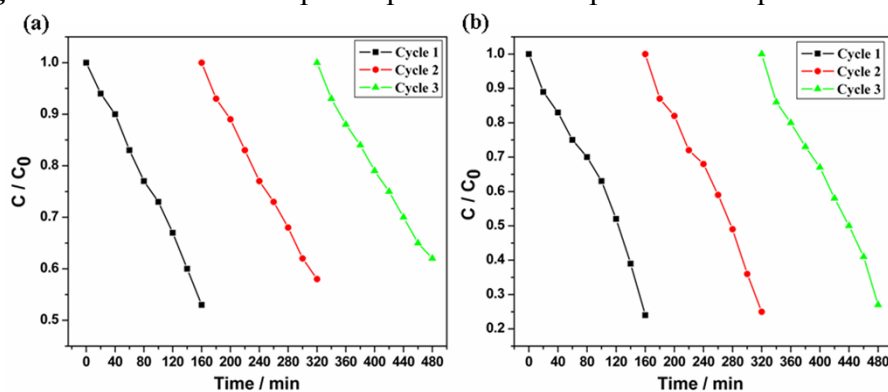

**Fig. S8.** Three time of the RhB degradation test by (a) NBu<sub>4</sub>)<sub>3</sub>[PW<sub>12</sub>O<sub>40</sub>], and (b) compound **1**.
